# Supplementary material for: Radiational tides: their double-counting in storm surge forecasts and contribution to the Highest Astronomical Tide
Source: Copernicus journal article supplement (doi:10.5194/os-14-1057-2018), 2018-09-14
Supplement: Supplementary file 1 [file os-14-1057-2018-supplement.zip]

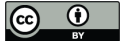

## *Supplement of*

# **Radiational tides: their double-counting in storm surge forecasts and contribution to the Highest Astronomical Tide**

**Joanne Williams et al.**

*Correspondence to:* Joanne Williams ([joll@noc.ac.uk](mailto:joll@noc.ac.uk))

- [os-14-1057-2018-supplement-title-page.pdf](#)
- [README.txt](#)
- [TidalConstituentsCombinedList115\\_62\\_34.xlsx](#)
- [coast\\_tidalcoeffs\\_incwind\\_amp.txt](#)
- [coast\\_tidalcoeffs\\_incwind\\_phase.txt](#)
- [coast\\_tidalcoeffs\\_nowind\\_amp.txt](#)
- [coast\\_tidalcoeffs\\_nowind\\_phase.txt](#)

The copyright of individual parts of the supplement might differ from the CC BY 4.0 License.
